# Supplementary material
Source: MDPI journal article supplement (https://www.mdpi.com/2306-5729/8/5/84)
Supplement: s1 [file s1]

# QUESTIONNAIRE ON SOCIAL ACCEPTANCE OF TECHNOLOGIES AND BIOPRODUCTS

S2. Supplementary material.

## INDEX

|                                                     |    |
|-----------------------------------------------------|----|
| INDEX .....                                         | 1  |
| ENGLISH VERSION .....                               | 2  |
| Introduction.....                                   | 2  |
| Demographic questions .....                         | 2  |
| Sustainability .....                                | 4  |
| Waste sorting at source and treatment.....          | 5  |
| Biofuels.....                                       | 6  |
| Biorefineries.....                                  | 7  |
| End of survey.....                                  | 8  |
| ORIGINAL VERSION OF THE SURVEY (SPANISH) .....      | 9  |
| Introducción .....                                  | 9  |
| Datos sociodemográficos .....                       | 10 |
| Sostenibilidad .....                                | 11 |
| Separación de residuos en origen y tratamiento..... | 13 |
| Biocombustibles.....                                | 14 |
| Biorefinerías.....                                  | 14 |
| Fin de la encuesta .....                            | 16 |

Project BIOTRES-CM (S2018/EMT-4344),  
funded by the Community of Madrid and the European Regional Development Fund.

## ENGLISH VERSION

### INTRODUCTION

The development of an economy based on the optimal use of renewable biological resources and waste, and their conversion into bioenergy and bioproducts (bioeconomy) is a priority objective for the European Union, Spain and the Community of Madrid.

In this regard, the BIOTRES is a research project co-financed by the Community of Madrid, the European Social Fund and the European Regional Development Fund, which seeks to improve the life quality for the citizens of the Community of Madrid by fostering the Bioeconomy through the development of biorefineries for the production of bioproducts and the co-production of bioenergy.

Adequate waste management allows the generation of high-value products to be incorporated back into the chain of consumption. This is why one of the specific objectives of this project is to understand the social acceptance of the different technologies under study in order to determine the feasibility of their implementation. This survey is part of a techno-economic and environmental study of the technologies considered in the project aimed at creating biofuels such as biogas, biomethane, biohydrogen or synthetic hydrocarbons.

Please complete this anonymous survey, which will take you no more than 20 minutes to complete. The results obtained will help us understand the opinion of the citizens of the Community of Madrid and make decisions based on them.

If you wish, you can find more information about the BIOTRES project at <https://madrid.bio3project.es/>.

### DEMOGRAPHIC QUESTIONS

To provide a sociodemographic analysis of the survey results, please answer the following questions.

We remind you that the survey is completely anonymous.

#### 1. What is your gender?

- a. Male
- b. Female
- c. Prefer not to say
- d. Other (specify)

#### 2. How old are you?

- a. Under 18
- b. 18-24

Project BIOTRES-CM (S2018/EMT-4344),  
funded by the Community of Madrid and the European Regional Development Fund.

- c. 25-34
  - d. 35-44
  - e. 45-54
  - f. 55-64
  - g. 65+
- 3. What is the ZIP code of the town where you live in the Community of Madrid (e.g. 28943, 28990....)?**
- 4. What is the highest level of education you have accomplished?**
- a. Without study
  - b. Preschool
  - c. Elementary school
  - d. Compulsory Secondary Education (E.S.O) - Basic Degree of Professional Training
  - e. Bachelor's degree - Intermediate Degree of Professional Training
  - f. Superior Degree of Professional Training
  - g. University Degree
  - h. University Master's Degree
  - i. Doctorate
- 5. How many people currently live in your home**
- 6. What is your current status of the following?**
- a. Working (salaried, employer, self-employed or family helper) full time
  - b. Doing household chores, taking care of children or other people
  - c. Pensioned, retired, early retired or have closed a business
  - d. Working (salaried, employer, self-employed or family help) part time
  - e. Student, school student, or trainee
  - f. Permanently unable to work
  - g. Unemployed
  - h. Another kind of economic inactivity
  - i. Other (please specify)
- 7. Considering all household members' income, which is the level of regular net monthly income?**
- a. Up to 499 euros
  - b. From 500 to 999 euros

Project BIOTRES-CM (S2018/EMT-4344),  
funded by the Community of Madrid and the European Regional Development Fund.

- c. From 1000 to 1499 euros
- d. From 1500 to 1999 euros
- e. From 2000 to 2499 euros
- f. From 2500 to 2999 euros
- g. From 3000 to 4999 euros
- h. Over 5000 euros

## SUSTAINABILITY

The following three questions raise issues related to your perception of sustainability and environmental improvement measures.

8. **Indicate your degree of agreement or disagreement with the following statements. If you do not have a clear opinion on any statement, please select N/A. Options: Completely disagree, Slightly disagree, Neither agree nor disagree, Slightly agree, Completely agree.**

We are currently immersed in a process of climate change that requires urgent measures to be taken.

Promoting the circular economy as an alternative to the current model of production and consumption is essential.

I am aware of the measures that different sectors, such as energy, food and pharmaceuticals, are taking to improve sustainability.

Society needs new products and solutions for a more efficient use of organic waste (food waste, and pruning and gardening waste).

Administrations must encourage the use of new, more sustainable fuels

I have enough information on how I can contribute to an efficient management of my waste.

I have enough information about new fuels coming from waste such as biogas.

I have enough information about waste treatment facilities that produce fuels such as biogas.

9. **Rank, from highest to lowest, those actions you consider more relevant to combat climate change**

**Redesign.** This means designing or manufacturing products with sustainability implications in mind.

**Reduce.** Decreasing both the amount of products we consume and the amount of products we generate as waste.

**Reuse.** Finding a new life for products that have already been used for their primary purpose.

**Repair.** Fixing before throwing it away or buying a new one.

Project BIOTRES-CM (S2018/EMT-4344),  
funded by the Community of Madrid and the European Regional Development Fund.

**Refurbish.** Upgrading objects so that they can have again the function for which they were created or can be used for other things that can also be useful.

**Recover.** Reusing the materials already used so that they can be reintroduced as raw materials in the production process.

**Recycle.** Sorting waste depending on whether they are organic, plastic, glass, paper or cardboard, metal or toxic and disposing them in the appropriate container.

**10. \*Rank, from highest to lowest, those environmental and socioeconomic issues that most concern you.**

Air pollution

Food security

Biodiversity loss, deforestation and/or land degradation

Waste disposal

Depletion of natural resources

Water pollution and/or scarcity

Socio-economic impact of climate change: loss of employment, worse economic situation...

Lack of respect for human rights in product value chains

## WASTE SORTING AT SOURCE AND TREATMENT

In this section you must answer two questions related to waste sorting at source and the effectiveness of waste treatment techniques.

**11. Rank, from highest to lowest, the waste treatments that you consider should be prioritized by the administration.**

**Incineration.** Waste is thermally destroyed by complete oxidation, transforming it into combustion gases and solid products (ash and slag).

**Controlled landfill.** The waste is deposited and/or buried in areas such as quarries or abandoned mines.

**Pyrolysis.** Waste is burned at high temperatures, generating more energy for its reuse and the production of bioproducts such as biogas.

**Composting.** Organic waste is decomposed to generate compost.

**12. \*Indicate your degree of agreement or disagreement with the following statements. Options: Completely disagree, Slightly disagree, Neither agree nor disagree, Slightly agree, Completely agree.**

I believe correctly sorting waste at the source is essential to facilitate its treatment.

Project BIOTRES-CM (S2018/EMT-4344),  
funded by the Community of Madrid and the European Regional Development Fund.

I always sort my waste: organic, packaging, glass, paper...

Incineration is the most efficient way to treat waste.

Controlled landfill is the most efficient way to treat waste.

Pyrolysis is the most efficient way to treat waste

Composting is the most efficient way to treat organic waste.

## BIOFUELS

In this section you will have to answer three questions related to your perception of biofuels.

Biofuels such as biogas, biomethane, biohydrogen or synthetic hydrocarbons are renewable fuels obtained from organic sources such as biomass and organic waste.

**13. How likely would you use biofuels versus other fuels if you had the opportunity to choose?**

Consider 1 as very unlikely and 5 as totally likely.

**14. Rank, from most to least important, the reasons why you WOULD use biofuels versus other fuels**

Because they are cheaper

Because they are more efficient

Because they are safer

Because they are better for the environment

Because there are economic incentives for their installation and/or consumption (reduction of cost, taxes...)

Because they generate employment opportunities in the surrounding area

**15. Rank, from most to least important, the reasons why you would NOT be willing to use biofuels versus other fuels.**

Because they are more expensive

Because they are less efficient

Because they are less safe

Because they may generate nuisances such as, for example, unpleasant odors

Because they require changes to my installation

Because their use is not yet sufficiently proven

Because there is no economic incentive for installation and/or consumption (cost reduction, tax reduction...)

Project BIOTRES-CM (S2018/EMT-4344),  
funded by the Community of Madrid and the European Regional Development Fund.

## BIOREFINERIES

In this section, you will have to answer four questions related to your perception of waste treatment plants (Biorefineries) aimed at generating high-value added products such as biofuels, bioenergy (electricity and heat), products for the pharmaceutical industry, and biopolymer production.

The low-cost production of biogas requires the creation of waste treatment facilities (biorefineries) close to the populations where it will be used.

- 16. Considering that biorefineries allow the generation of high value-added products such as biofuels, bioenergy (electricity and heat), products for the pharmaceutical industry and production of biopolymers, indicate the degree of agreement or disagreement with the following statements.** Options: Completely disagree, Slightly disagree, Neither agree nor disagree, Slightly agree, Completely agree.

The inconvenience of having a biorefinery near my home is more than outweighed by the sustainability benefits they offer.

I would like to enjoy the benefits of biorefineries, but as long as the facility is not located close to my residence.

Biorefineries contribute to a more sustainable economic and consumption model.

If I had the possibility, I would use products obtained in biorefineries, such as biofuels, bioenergy (electricity and heat), products for the pharmaceutical industry and the production of biopolymers, because I trust these products.

If I had the possibility, I would use products obtained from biorefineries, such as biofuels, bioenergy (electricity and heat), products for the pharmaceutical industry and biopolymer production, even if the price is even somewhat more expensive.

- 17. How far away from your home would you be willing to have a biorefinery installed if it allowed you to have products such as biofuels or bioenergy (electricity and heat) available at your home?** Choose between 1 and 30 km

- 18. In case a facility is decided to be built in your town, please indicate which of the following requirements would you consider essential.**

That odors produced by the treatment plant were reduced or eliminated by means of odor capture systems, roofing, etc., and that the plant had insect pest treatment systems.

That it generated local employment.

That it promoted collaboration with industry and businesses in the region.

That locations that reduce the visual impact of the facility were chosen.

Project BIOTRES-CM (S2018/EMT-4344),  
funded by the Community of Madrid and the European Regional Development Fund.

That the generation of this bioenergy were used for local demand in the area (for example, in electricity or heat).

That additional locations were sought or additional road infrastructure were built to reduce the impact of truck traffic.

That all measures to make the plant safe were taken.

Under no circumstances I would be willing to have it installed in my town or in any other nearby town.

Other (specify)

**19. Rank, from most to least, the aspects that most concern you about the installation of a waste treatment plant near your home.**

Odors, insect infestation, dirt, etc.

Visual impact

Heavy truck traffic

Unsafety

Plant construction nuisances

**END OF SURVEY**

**20. If you wish, you may leave a final comment on any of the issues raised.**

**21. If you are interested in receiving the results of the survey, you can provide us with an e-mail address so that we can send them to you once they are available.**

Project BIOTRES-CM (S2018/EMT-4344),  
funded by the Community of Madrid and the European Regional Development Fund.



## ORIGINAL VERSION OF THE SURVEY (SPANISH)

### INTRODUCCIÓN

El desarrollo de una **economía basada en la utilización óptima de recursos y residuos biológicos renovables y su conversión en bioenergía y bioproductos (bioeconomía)** es un objetivo prioritario para la Unión Europea, España y la Comunidad de Madrid. En este contexto, el **proyecto BIOTRES** está desarrollando una investigación cofinanciada por la Comunidad de Madrid, el Fondo Social Europeo y el Fondo Europeo de Desarrollo Regional, que busca mejorar la calidad de vida de la ciudadanía de la Comunidad de Madrid, **impulsando la Bioeconomía a través del desarrollo de biorrefinerías** para la producción de bioproductos y la coproducción de bioenergía.

La gestión adecuada de los residuos permite generar **productos de valor** que pueden incorporarse de nuevo en la cadena de consumo, por lo que uno de los objetivos específicos del proyecto es conocer cuál es la **aceptación social de las diferentes tecnologías estudiadas para conocer la viabilidad de su implantación**. Esta encuesta forma parte de un estudio tecno-económico y ambiental de las tecnologías consideradas en el proyecto dirigidas a crear biocombustibles como el biogas, el biometano, el biohidrógeno o los hidrocarburos sintéticos.

Le agradecemos que complete de forma sincera esta encuesta, de carácter anónimo, que no le llevará completar más de **20 minutos**, ya que los resultados obtenidos ayudarán a conocer la opinión de los ciudadanos de la Comunidad de Madrid y a tomar decisiones a partir de ellos.

Si lo desea, puede obtener más información sobre el proyecto BIOTRES en la web <https://madrid.bio3project.es/>

Project BIOTRES-CM (S2018/EMT-4344),  
funded by the Community of Madrid and the European Regional Development Fund.

## DATOS SOCIODEMOGRÁFICOS

Con el fin de analizar sociodemográficamente los resultados de la encuesta, le agradeceremos que responda a las siguientes preguntas.

Le recordamos que la encuesta es completamente anónima.

**1. ¿Cuál es su género?**

- a. Masculino
- b. Femenino
- c. Prefiero no decir
- d. Otro (especificar)

**2. ¿Cuál es su edad?**

- a. Menos de 18
- b. 18-24
- c. 25-34
- d. 35-44
- e. 45-54
- f. 55-64
- g. 65+

**3. ¿Cuál es el código postal de la localidad en la que vive en la Comunidad de Madrid? (por ejemplo, 28943, 28990....)**

**4. ¿Cuál es el nivel más alto de educación que ha completado?**

- a. Sin estudios
- b. Preescolar
- c. Primaria
- d. Enseñanza Secundaria Obligatoria - Grado básico de Formación Profesional
- e. Bachillerato - Grado medio de Formación Profesional
- f. Grado superior de Formación Profesional
- g. Grado universitario
- h. Máster universitario
- i. Doctorado

Project BIOTRES-CM (S2018/EMT-4344),  
funded by the Community of Madrid and the European Regional Development Fund.

5. ¿Cuántas personas viven actualmente en su hogar?

6. ¿En qué situación de las siguientes se encuentra en la actualidad?

- a. Trabajando (asalariado, empresario, trabajador independiente o ayuda familiar) a tiempo completo
- b. Dedicado a las labores del hogar, al cuidado de niños u otras personas
- c. Jubilado, retirado, jubilado anticipado o ha cerrado un negocio
- d. Trabajando (asalariado, empresario, trabajador independiente o ayuda familiar) a tiempo parcial
- e. Estudiante, escolar, o en formación
- f. Incapacitado permanente para trabajar
- g. Parado
- h. Otra clase de inactividad económica
- i. Otra (por favor especifique)

7. Considerando todos los ingresos de los miembros de su hogar, ¿cuál sería el nivel de ingresos mensuales netos regulares?

- a. Hasta 499 euros
- b. De 500 a 999 euros
- c. De 1000 a 1499 euros
- d. De 1500 a 1999 euros
- e. De 2000 a 2499 euros
- f. De 2500 a 2999 euros
- g. De 3000 a 4999 euros
- h. 5000 euros o más

## SOSTENIBILIDAD

Las siguientes tres preguntas plantean cuestiones relacionadas con su percepción sobre medidas dirigidas a mejorar la sostenibilidad y el cuidado del medio ambiente.

8. **Indique su grado de acuerdo o desacuerdo con las siguientes afirmaciones. Si no tiene una opinión formada sobre alguna afirmación, seleccione la opción N/A. Opciones: Totalmente en desacuerdo, Algo en desacuerdo, Ni de acuerdo ni en desacuerdo, Algo de acuerdo, Totalmente de acuerdo.**

Estamos inmersos en un proceso de cambio climático que requiere tomar medidas urgentes

Project BIOTRES-CM (S2018/EMT-4344),  
funded by the Community of Madrid and the European Regional Development Fund.

Es fundamental impulsar la economía circular como alternativa al modelo actual de producción y consumo

Estoy al tanto de las medidas que diferentes sectores, como el energético, el alimenticio o el farmacéutico, están tomando para mejorar la sostenibilidad.

La sociedad necesita nuevos productos y soluciones para una utilización más eficaz de los residuos orgánicos (restos de alimentos y residuos de poda y jardinería)

Las administraciones deben impulsar el uso de nuevos combustibles más sostenibles

Tengo suficiente información sobre cómo puedo contribuir a una gestión eficaz de mis residuos

Tengo suficiente información sobre nuevos combustibles que provengan de residuos como el biogas

Tengo suficiente información sobre las plantas de tratamiento de residuos para producir combustibles como el biogas

**9. Clasifique, de mayor a menor, aquellas acciones que considera más relevantes para combatir el cambio climático**

**Rediseñar.** Es decir, diseñar o fabricar productos teniendo en cuenta las consecuencias en la sostenibilidad.

**Reducir.** Disminuir tanto la cantidad de productos que consumimos como los que generamos como residuos.

**Reutilizar.** Darle un nuevo uso a los productos que ya han sido utilizados para su finalidad principal.

**Reparar.** Arreglar antes de tirarlo y comprar uno nuevo

**Renovar.** Actualizar los objetos para que puedan tener de nuevo la función para la que fueron creados o reutilíalos para otras cosas que también puedan ser de utilidad.

**Recuperar.** Usar los materiales ya usados para poder reintroducirlos como materia prima en el proceso productivo

**Reciclar.** Separar los desperdicios según sean orgánicos, plásticos, vidrios, papel o cartón, metales o tóxicos y deséchalos en el contenedor oportuno.

**10. Clasifique, de mayor a menor, aquellas cuestiones ambientales y socioeconómicas que más le preocupen**

Contaminación del aire

Seguridad alimentaria

Pérdida de la biodiversidad, deforestación y/o degradación del suelo

Project BIOTRES-CM (S2018/EMT-4344),  
funded by the Community of Madrid and the European Regional Development Fund.

Eliminación de residuos

Agotamiento de recursos naturales

Contaminación y/o escasez del agua

Impacto socio-económico del cambio climático: pérdida de empleo, peor situación económica...

Falta de respeto por los derechos humanos en las cadenas de valor de productos

## SEPARACIÓN DE RESIDUOS EN ORIGEN Y TRATAMIENTO

En esta sección debe responder a dos preguntas relacionadas con la separación de residuos en origen y la eficacia de las técnicas de tratamiento de residuos.

**11. Ordene, de mayor a menor, los tratamientos de residuos que considera que deben priorizarse por parte de la administración.**

**Incineración.** Se destruyen térmicamente mediante su oxidación completa, transformándolos en gases de combustión y productos sólidos (cenizas y escorias).

**Vertido controlado.** Los residuos se depositan y/o entierran en espacios como canteras o minas abandonadas.

**Pirólisis.** Los residuos se queman a altas temperaturas, generando más energía para su reutilización y la elaboración de bioproductos como el biogas.

**Compostaje.** Los residuos orgánicos se descomponen para generar compost.

**12. Indique su grado de acuerdo o desacuerdo con las siguientes afirmaciones. Opciones: Totalmente en desacuerdo, Algo en desacuerdo, Ni de acuerdo ni en desacuerdo, Algo de acuerdo, Totalmente de acuerdo.**

Creo que es fundamental separar correctamente los residuos en origen para facilitar su tratamiento

Separo siempre los residuos: orgánico, envases, vidrio, papel...

La incineración es la forma más eficaz de tratar los residuos

El vertido controlado es la forma más eficaz de tratar los residuos

La pirólisis es la forma más eficaz de tratar los residuos

El compostaje es la forma más eficaz de tratar los residuos orgánicos

Project BIOTRES-CM (S2018/EMT-4344),  
funded by the Community of Madrid and the European Regional Development Fund.

## BIOCOMBUSTIBLES

En esta sección deberá responder tres preguntas relacionadas con su percepción sobre los biocombustibles.

Los biocombustibles como el biogás, el biometano, el biohidrógeno o los hidrocarburos sintéticos, son combustibles renovables que se obtienen a partir de fuentes orgánicas como la biomasa y los residuos orgánicos.

**13. ¿Con qué probabilidad usaría biocombustibles frente a otros combustibles si tuviese oportunidad de hacerlo? Considere el 1 como muy poco probable y el 5 como totalmente probable.**

**14. Ordene de mayor a menor importancia las razones por las que SÍ utilizaría biocombustibles frente a otros combustibles**

Porque sean más económicos

Porque sean más eficientes

Porque sean más seguros

Porque sean mejores para el medio ambiente

Porque haya ayudas económicas de incentivo para la instalación y/o el consumo de estos (reducción de coste, de impuestos...)

Porque generen empleo en mi entorno próximo

**15. Ordene de mayor a menor importancia las razones por las que NO estaría dispuesto a usar biocombustibles frente a otros combustibles**

Porque sean más caros

Porque sean menos eficientes

Porque sean menos seguros

Porque puedan generar molestias como, por ejemplo, olores desagradables

Porque requieran hacer cambios en mi instalación

Porque no esté suficientemente probado aún su uso

Porque no haya ayudas económicas de incentivo para la instalación y/o para el consumo (reducción de coste, de impuestos...)

## BIOREFINERÍAS

En esta sección deberá responder cuatro preguntas relacionadas con su percepción sobre las plantas de tratamiento de residuos (Biorefinerías) dirigidas a **generar productos de alto valor añadido** como biocombustibles, bioenergía (electricidad y calor), productos para la industria farmacéutica y producción de biopolímeros.

Project BIOTRES-CM (S2018/EMT-4344),  
funded by the Community of Madrid and the European Regional Development Fund.

La producción barata de biogás requiere crear instalaciones de tratamiento de residuos (biorrefinerías) cerca de las poblaciones en las que se va a usar.

- 16. Considerando que las biorrefinerías permiten generar productos de alto valor añadido como biocombustibles, bioenergía (electricidad y calor), productos para la industria farmacéutica y producción de biopolímeros, indique el grado de acuerdo o desacuerdo con las siguientes afirmaciones. Opciones: Totalmente en desacuerdo, Algo en desacuerdo, Ni de acuerdo ni en desacuerdo, Algo de acuerdo, Totalmente de acuerdo.**

Las molestias que pudiera ocasionar la instalación de biorrefinería cerca de mi hogar se compensan de sobra con los beneficios en materia de sostenibilidad que ofrecen

Me gustaría disfrutar de las ventajas de las biorrefinerías, pero siempre que ello no suponga que la instalación esté cerca de mi hogar

Las biorrefinerías contribuyen a un modelo económico y de consumo más sostenible

Si tuviese posibilidad, usaría productos obtenidos en las biorrefinerías, como biocombustibles, bioenergía (electricidad y calor), productos para la industria farmacéutica y producción de biopolímeros, porque me generan confianza.

Si tuviese posibilidad, usaría productos obtenidos en las biorrefinerías, como biocombustibles, bioenergía (electricidad y calor), productos para la industria farmacéutica y producción de biopolímeros, aunque el precio fuese incluso algo más caro.

- 17. ¿A qué distancia mínima de su domicilio estaría dispuesto a que se instalase una biorrefinería si ello le permitiese disponer de productos como biocombustibles o bioenergía (electricidad y calor) en su hogar? Elija entre 1 y 30 km**

- 18. En el caso de que se decidiese que la instalación de la planta se realizase en su población, indique cuáles, de los siguientes requisitos consideraría imprescindibles.**

Que los olores que pueda producir la planta de tratamiento se reduzcan o eliminen mediante sistemas de capturas de olores, techado, etc., y que la planta cuente con sistemas de tratamiento de plagas de insectos.

Que genere empleo local

Que impulse la colaboración con la industria y negocios de la región

Que se busquen localizaciones que reduzcan el impacto visual de la instalación

Project BIOTRES-CM (S2018/EMT-4344),  
funded by the Community of Madrid and the European Regional Development Fund.

Que la generación de esa bioenergía se destine a la demanda local de la zona (por ejemplo, en electricidad o calor)

Que se busquen localizaciones o se realicen infraestructuras viarias adicionales que reduzcan el impacto de la circulación de camiones

Que se tomen todas las medidas para que la planta sea segura

En ningún caso estaría dispuesto a que se instalase en mi población ni en ninguna otra cercana

Otro (especifique)

**19. Orden de mayor a menor los aspectos que más le preocupan de la instalación de una planta de tratamiento de residuos cerca de su hogar.**

Que haya olores o plagas de insectos, suciedad, etc.

Que tengan impacto visual

Que haya mucha circulación de camiones

Que pueda ser inseguro

Que la construcción de la planta genere molestias

**FIN DE LA ENCUESTA**

**20. Si lo desea, puede dejar un comentario final sobre cualquiera de las cuestiones tratadas.**

**21. Si está interesado en recibir los resultados de la encuesta, puede indicarnos un correo electrónico para que le enviemos estos una vez que estén disponibles.**

Project BIOTRES-CM (S2018/EMT-4344),  
funded by the Community of Madrid and the European Regional Development Fund.
