# Supplementary material
Source: MDPI journal article supplement (https://www.mdpi.com/2306-5729/8/5/84)
Supplement: s1 [file s1]

# DATA STRUCTURE AND BASIC INFORMATION TO INTERPRET THE DATA

S3. Supplementary material.

## INDEX

|                                             |   |
|---------------------------------------------|---|
| INDEX.....                                  | 1 |
| INTRODUCTION.....                           | 2 |
| SECTION ID TABLE .....                      | 2 |
| QUESTIONNAIRE BASIC INFORMATION TABLE ..... | 3 |

Project BIOTRES-CM (S2018/EMT-4344),  
funded by the Community of Madrid and the European Regional Development Fund.

## INTRODUCTION

This document contains two important pieces of information. Both are in a table format. The first identifies the connection between the sections and their respective IDs. The second includes all the information needed to correctly interpretate the dataset.

## SECTION ID TABLE

The section id is utilized to create the question id and is included ID is included at the beginning of the question ID (Q.ID) in order to facilitate the comprehension of the context of the question.

| Section ID | Section topic                                                                | Questions included in the section |
|------------|------------------------------------------------------------------------------|-----------------------------------|
| A          | Sociodemographic questions                                                   | 1 to 7                            |
| B          | Attitudes towards sustainability                                             | 8 to 10                           |
| C          | Attitudes and perceptions about waste sorting at source and waste treatment  | 11 and 12                         |
| D          | Attitudes and perceptions regarding the acceptance of biofuels               | 13 to 15                          |
| E          | Attitudes and perceptions regarding the acceptance of biorefinery facilities | 16 to 19                          |
| F          | End of survey                                                                | 20 and 21                         |

Project BIOTRES-CM (S2018/EMT-4344),  
funded by the Community of Madrid and the European Regional Development Fund.

## QUESTIONNAIRE BASIC INFORMATION TABLE

The next table is important to understand how the dataset is structured. First, we find the question ID column (Q.ID) that includes a unique identifier of the question. The second column includes the type of question which is important to understand how to proceed with the interpretation of the values included in the dataset.

There are different types of questions:

- One choice question: respondents can only choose one of the options provided as possible answers.
- Multiple choice question: respondents can choose one or more options.
- Likert scale question: respondents can only choose one of the following options: Completely disagree; Slightly disagree; Neither agree nor disagree; Slightly agree; Completely agree; N/A.
- Open-ended: respondents can include the response in a text box. Sometimes the text is restricted to certain characters (such as numbers only)
- Ordering question: respondents are asked to rank several options.

The third column is a short definition that helps to understand the main topic of the question the more easily. Fourth column shows the questions which are also included in the dataset. Each question is represented as a column in the dataset. Instead, in the fifth column of this table you can find the different values that the answer can adopt.

In addition, two more columns have been included to show the original questions asked to the respondents. This information corresponds to the sixth and seventh columns of the next table.

We highly recommend keeping the next table accessible when approaching the dataset.

Project BIOTRES-CM (S2018/EMT-4344),  
funded by the Community of Madrid and the European Regional Development Fund.

| Q.ID | Q. Type                               | Short definition | Translation (English)                                                                               |                                                                    | Original formulation (Spanish)                                                                                      |                                                                       |
|------|---------------------------------------|------------------|-----------------------------------------------------------------------------------------------------|--------------------------------------------------------------------|---------------------------------------------------------------------------------------------------------------------|-----------------------------------------------------------------------|
|      |                                       |                  | Question                                                                                            | Values (separated by ; )                                           | Question                                                                                                            | Values (separated by ; )                                              |
| A1   | One choice +<br>Open-ended<br>"other" | Gender           | What is your gender?                                                                                | Male; Female; Prefer not to say; Other (specify)                   | ¿Cuál es su género?                                                                                                 | Masculino; Femenino; Prefiero no decir; Otro (especificar)            |
| A2   | One choice                            | Age              | How old are you?                                                                                    | Under 18;<br>18-24;<br>25-34;<br>35-44;<br>45-54;<br>55-64;<br>65+ | ¿Cuál es su edad?                                                                                                   | Menos de 18;<br>18-24;<br>25-34;<br>35-44;<br>45-54;<br>55-64;<br>65+ |
| A3   | Open-ended                            | ZIP code         | What is the ZIP code of the town where you live in the Community of Madrid (e.g. 28943, 28990....)? | --                                                                 | ¿Cuál es el código postal de la localidad en la que vive en la Comunidad de Madrid? (por ejemplo, 28943, 28990....) | --                                                                    |

Project BIOTRES-CM (S2018/EMT-4344),  
funded by the Community of Madrid and the European Regional Development Fund.

| Q.ID | Q. Type    | Short definition | Translation (English)                                         |                                                                                                                                                                                                                                                                                                                           | Original formulation (Spanish)                             |                                                                                                                                                                                                                                                                                               |
|------|------------|------------------|---------------------------------------------------------------|---------------------------------------------------------------------------------------------------------------------------------------------------------------------------------------------------------------------------------------------------------------------------------------------------------------------------|------------------------------------------------------------|-----------------------------------------------------------------------------------------------------------------------------------------------------------------------------------------------------------------------------------------------------------------------------------------------|
|      |            |                  | Question                                                      | Values (separated by ; )                                                                                                                                                                                                                                                                                                  | Question                                                   | Values (separated by ; )                                                                                                                                                                                                                                                                      |
| A4   | One choice | Level of study   | What is the highest level of education you have accomplished? | Without study;<br>Preschool;<br>Elementary school;<br>Compulsory Secondary Education (E.S.O) - Basic Degree of Professional Training;<br>Bachelor's degree - Intermediate Degree of Professional Training;<br>Superior Degree of Professional Training;<br>University Degree;<br>University Master's Degree;<br>Doctorate | ¿Cuál es el nivel más alto de educación que ha completado? | No tengo estudios;<br>Preescolar;<br>Primaria;<br>Enseñanza Secundaria Obligatoria - Grado básico de Formación Profesional;<br>Bachillerato - Grado medio de Formación Profesional;<br>Grado superior de Formación Profesional;<br>Grado universitario;<br>Máster universitario;<br>Doctorado |
| A5   |            | Household number | How many people currently live in your home                   | [numeric response]                                                                                                                                                                                                                                                                                                        | ¿Cuántas personas viven actualmente en su hogar?           | [numeric response]                                                                                                                                                                                                                                                                            |

Project BIOTRES-CM (S2018/EMT-4344),  
funded by the Community of Madrid and the European Regional Development Fund.

| Q.ID | Q. Type                                      | Short definition  | Translation (English)                         |                                                                                                                                                                                                                                                                                                                                                                                                                                                                                      | Original formulation (Spanish)                                     |                                                                                                                                                                                                                                                                                                                                                                                                                                                                                                                                                                   |
|------|----------------------------------------------|-------------------|-----------------------------------------------|--------------------------------------------------------------------------------------------------------------------------------------------------------------------------------------------------------------------------------------------------------------------------------------------------------------------------------------------------------------------------------------------------------------------------------------------------------------------------------------|--------------------------------------------------------------------|-------------------------------------------------------------------------------------------------------------------------------------------------------------------------------------------------------------------------------------------------------------------------------------------------------------------------------------------------------------------------------------------------------------------------------------------------------------------------------------------------------------------------------------------------------------------|
|      |                                              |                   | Question                                      | Values (separated by ; )                                                                                                                                                                                                                                                                                                                                                                                                                                                             | Question                                                           | Values (separated by ; )                                                                                                                                                                                                                                                                                                                                                                                                                                                                                                                                          |
| A6   | One choice + Open-ended<br>"Other (specify)" | Employment status | What is your current status of the following? | <p>Working (salaried, employer, self-employed or family helper) full time;</p> <p>Doing household chores, taking care of children or other people;</p> <p>Pensioned, retired, early retired or have closed a business;</p> <p>Working (salaried, employer, self-employed or family help) part time;</p> <p>Student, school student, or trainee;</p> <p>Permanently unable to work;</p> <p>Unemployed;</p> <p>Another kind of economic inactivity;</p> <p>Other (please specify);</p> | ¿En qué situación de las siguientes se encuentra en la actualidad? | <p>Trabajando (asalariado, empresario, trabajador independiente o ayuda familiar) a tiempo completo;</p> <p>Dedicado a las labores del hogar, al cuidado de niños u otras personas;</p> <p>Jubilado, retirado, jubilado anticipado o ha cerrado un negocio;</p> <p>Trabajando (asalariado, empresario, trabajador independiente o ayuda familiar) a tiempo parcial;</p> <p>Estudiante, escolar, o en formación;</p> <p>Incapacitado permanente para trabajar;</p> <p>Parado;</p> <p>Otra clase de inactividad económica;</p> <p>Otra (por favor especifique);</p> |

Project BIOTRES-CM (S2018/EMT-4344),  
funded by the Community of Madrid and the European Regional Development Fund.

| Q.ID | Q. Type      | Short definition | Translation (English)                                                                                                                                    |                                                                                                                                                                                                            | Original formulation (Spanish)                                                                                                                              |                                                                                                                                                                                           |
|------|--------------|------------------|----------------------------------------------------------------------------------------------------------------------------------------------------------|------------------------------------------------------------------------------------------------------------------------------------------------------------------------------------------------------------|-------------------------------------------------------------------------------------------------------------------------------------------------------------|-------------------------------------------------------------------------------------------------------------------------------------------------------------------------------------------|
|      |              |                  | Question                                                                                                                                                 | Values (separated by ; )                                                                                                                                                                                   | Question                                                                                                                                                    | Values (separated by ; )                                                                                                                                                                  |
| A7   | One choice   | Household income | Considering all household members' income, which is the level of regular net monthly income?                                                             | Up to 499 euros;<br>From 500 to 999 euros;<br>From 1000 to 1499 euros;<br>From 1500 to 1999 euros;<br>From 2000 to 2499 euros;<br>From 2500 to 2999 euros;<br>From 3000 to 4999 euros;<br>Over 5000 euros; | Considerando todos los ingresos de los miembros de su hogar, ¿cuál sería el nivel de ingresos mensuales netos regulares?                                    | Hasta 499 euros;<br>De 500 a 999 euros;<br>De 1000 a 1499 euros;<br>De 1500 a 1999 euros;<br>De 2000 a 2499 euros;<br>De 2500 a 2999 euros;<br>De 3000 a 4999 euros;<br>5000 euros o más; |
| B8   | --           | --               | Indicate your degree of agreement or disagreement with the following statements. If you do not have a clear opinion on any statement, please select N/A. | --                                                                                                                                                                                                         | Indique su grado de acuerdo o desacuerdo con las siguientes afirmaciones. Si no tiene una opinión formada sobre alguna afirmación, seleccione la opción N/A | --                                                                                                                                                                                        |
| B8.1 | Likert scale | Urgent measures  | We are currently immersed in a process of climate change that requires urgent measures to be taken.                                                      | Completely disagree;<br>Slightly disagree;<br>Neither agree nor disagree;<br>Slightly agree;<br>Completely agree;<br>N/A;                                                                                  | Estamos inmersos en un proceso de cambio climático que requiere tomar medidas urgentes                                                                      | Totalmente en desacuerdo;<br>Algo en desacuerdo;<br>Ni de acuerdo ni en desacuerdo;<br>Algo de acuerdo;<br>Totalmente de acuerdo;<br>N/A;                                                 |

Project BIOTRES-CM (S2018/EMT-4344),  
funded by the Community of Madrid and the European Regional Development Fund.

| Q.ID | Q. Type      | Short definition    | Translation (English)                                                                                                              |                                                                                                                           | Original formulation (Spanish)                                                                                                                                            |                                                                                                                                                       |
|------|--------------|---------------------|------------------------------------------------------------------------------------------------------------------------------------|---------------------------------------------------------------------------------------------------------------------------|---------------------------------------------------------------------------------------------------------------------------------------------------------------------------|-------------------------------------------------------------------------------------------------------------------------------------------------------|
|      |              |                     | Question                                                                                                                           | Values (separated by ; )                                                                                                  | Question                                                                                                                                                                  | Values (separated by ; )                                                                                                                              |
| B8.2 | Likert scale | Alternative CE      | Promoting the circular economy as an alternative to the current model of production and consumption is essential.                  | Completely disagree;<br>Slightly disagree;<br>Neither agree nor disagree;<br>Slightly agree;<br>Completely agree;<br>N/A; | <i>Es fundamental impulsar la economía circular como alternativa al modelo actual de producción y consumo</i>                                                             | <i>Totalmente en desacuerdo;<br/>Algo en desacuerdo;<br/>Ni de acuerdo ni en desacuerdo;<br/>Algo de acuerdo;<br/>Totalmente de acuerdo;<br/>N/A;</i> |
| B8.3 | Likert scale | Sector measures     | I am aware of the measures that different sectors, such as energy, food and pharmaceuticals, are taking to improve sustainability. | Completely disagree;<br>Slightly disagree;<br>Neither agree nor disagree;<br>Slightly agree;<br>Completely agree;<br>N/A; | <i>Estoy al tanto de las medidas que diferentes sectores, como el energético, el alimenticio o el farmacéutico, están tomando para mejorar la sostenibilidad.</i>         | <i>Totalmente en desacuerdo;<br/>Algo en desacuerdo;<br/>Ni de acuerdo ni en desacuerdo;<br/>Algo de acuerdo;<br/>Totalmente de acuerdo;<br/>N/A;</i> |
| B8.4 | Likert scale | Efficient waste use | Society needs new products and solutions for a more efficient use of organic waste (food waste, and pruning and gardening waste).  | Completely disagree;<br>Slightly disagree;<br>Neither agree nor disagree;<br>Slightly agree;<br>Completely agree;<br>N/A; | <i>La sociedad necesita nuevos productos y soluciones para una utilización más eficaz de los residuos orgánicos (restos de alimentos y residuos de poda y jardinería)</i> | <i>Totalmente en desacuerdo;<br/>Algo en desacuerdo;<br/>Ni de acuerdo ni en desacuerdo;<br/>Algo de acuerdo;<br/>Totalmente de acuerdo;<br/>N/A;</i> |

Project BIOTRES-CM (S2018/EMT-4344),  
funded by the Community of Madrid and the European Regional Development Fund.



| Q.ID | Q. Type      | Short definition                     | Translation (English)                                                                     |                                                                                                                           | Original formulation (Spanish)                                                                         |                                                                                                                                                       |
|------|--------------|--------------------------------------|-------------------------------------------------------------------------------------------|---------------------------------------------------------------------------------------------------------------------------|--------------------------------------------------------------------------------------------------------|-------------------------------------------------------------------------------------------------------------------------------------------------------|
|      |              |                                      | Question                                                                                  | Values (separated by ; )                                                                                                  | Question                                                                                               | Values (separated by ; )                                                                                                                              |
| B8.5 | Likert scale | Administrations new fuels use        | Administrations must encourage the use of new, more sustainable fuels                     | Completely disagree;<br>Slightly disagree;<br>Neither agree nor disagree;<br>Slightly agree;<br>Completely agree;<br>N/A; | <i>Las administraciones deben impulsar el uso de nuevos combustibles más sostenibles</i>               | <i>Totalmente en desacuerdo;<br/>Algo en desacuerdo;<br/>Ni de acuerdo ni en desacuerdo;<br/>Algo de acuerdo;<br/>Totalmente de acuerdo;<br/>N/A;</i> |
| B8.6 | Likert scale | Info efficient waste self-management | I have enough information on how I can contribute to an efficient management of my waste. | Completely disagree;<br>Slightly disagree;<br>Neither agree nor disagree;<br>Slightly agree;<br>Completely agree;<br>N/A; | <i>Tengo suficiente información sobre cómo puedo contribuir a una gestión eficaz de mis residuos</i>   | <i>Totalmente en desacuerdo;<br/>Algo en desacuerdo;<br/>Ni de acuerdo ni en desacuerdo;<br/>Algo de acuerdo;<br/>Totalmente de acuerdo;<br/>N/A;</i> |
| B8.7 | Likert scale | Info biofuels                        | I have enough information about new fuels coming from waste such as biogas.               | Completely disagree;<br>Slightly disagree;<br>Neither agree nor disagree;<br>Slightly agree;<br>Completely agree;<br>N/A; | <i>Tengo suficiente información sobre nuevos combustibles que provengan de residuos como el biogas</i> | <i>Totalmente en desacuerdo;<br/>Algo en desacuerdo;<br/>Ni de acuerdo ni en desacuerdo;<br/>Algo de acuerdo;<br/>Totalmente de acuerdo;<br/>N/A;</i> |

Project BIOTRES-CM (S2018/EMT-4344),  
funded by the Community of Madrid and the European Regional Development Fund.

| Q.ID | Q. Type      | Short definition      | Translation (English)                                                                                             |                                                                                                                           | Original formulation (Spanish)                                                                                             |                                                                                                                                                       |
|------|--------------|-----------------------|-------------------------------------------------------------------------------------------------------------------|---------------------------------------------------------------------------------------------------------------------------|----------------------------------------------------------------------------------------------------------------------------|-------------------------------------------------------------------------------------------------------------------------------------------------------|
|      |              |                       | Question                                                                                                          | Values (separated by ; )                                                                                                  | Question                                                                                                                   | Values (separated by ; )                                                                                                                              |
| B8.8 | Likert scale | Info waste facilities | I have enough information about waste treatment facilities that produce fuels such as biogas.                     | Completely disagree;<br>Slightly disagree;<br>Neither agree nor disagree;<br>Slightly agree;<br>Completely agree;<br>N/A; | <i>Tengo suficiente información sobre las plantas de tratamiento de residuos para producir combustibles como el biogas</i> | <i>Totalmente en desacuerdo;<br/>Algo en desacuerdo;<br/>Ni de acuerdo ni en desacuerdo;<br/>Algo de acuerdo;<br/>Totalmente de acuerdo;<br/>N/A;</i> |
| B9   | Ordering     | --                    | Rank, from highest to lowest, those actions you consider more relevant to combat climate change                   | --                                                                                                                        | <i>Clasifique, de mayor a menor, aquellas acciones que considera más relevantes para combatir el cambio climático</i>      | --                                                                                                                                                    |
| B9.1 | --           | Redesign ranking      | <b>Redesign.</b> This means designing or manufacturing products with sustainability implications in mind.         | [numeric value 1 to 7]                                                                                                    | <b>Rediseñar.</b> Es decir, diseñar o fabricar productos teniendo en cuenta las consecuencias en la sostenibilidad.        | [numeric value 1 to 7]                                                                                                                                |
| B9.2 | --           | Reduce ranking        | <b>Reduce.</b> Decreasing both the amount of products we consume and the amount of products we generate as waste. | [numeric value 1 to 7]                                                                                                    | <b>Reducir.</b> Disminuir tanto la cantidad de productos que consumimos como los que generamos como residuos.              | [numeric value 1 to 7]                                                                                                                                |

Project BIOTRES-CM (S2018/EMT-4344),  
funded by the Community of Madrid and the European Regional Development Fund.

| Q.ID | Q. Type | Short definition  | Translation (English)                                                                                                                                             |                          | Original formulation (Spanish)                                                                                                                                                  |                          |
|------|---------|-------------------|-------------------------------------------------------------------------------------------------------------------------------------------------------------------|--------------------------|---------------------------------------------------------------------------------------------------------------------------------------------------------------------------------|--------------------------|
|      |         |                   | Question                                                                                                                                                          | Values (separated by ; ) | Question                                                                                                                                                                        | Values (separated by ; ) |
| B9.3 | --      | Reuse ranking     | <b>Reuse.</b> Finding a new life for products that have already been used for their primary purpose.                                                              | [numeric value 1 to 7]   | <b>Reutilizar.</b> Darle un nuevo uso a los productos que ya han sido utilizados para su finalidad principal.                                                                   | [numeric value 1 to 7]   |
| B9.4 | --      | Repair ranking    | <b>Repair.</b> Fixing before throwing it away or buying a new one.                                                                                                | [numeric value 1 to 7]   | <b>Reparar.</b> Arreglar antes de tirarlo y comprar uno nuevo                                                                                                                   | [numeric value 1 to 7]   |
| B9.5 | --      | Refurbish ranking | <b>Refurbish.</b> Upgrading objects so that they can have again the function for which they were created or can be used for other things that can also be useful. | [numeric value 1 to 7]   | <b>Renovar.</b> Actualizar los objetos para que puedan tener de nuevo la función para la que fueron creados o reutilízalos para otras cosas que también puedan ser de utilidad. | [numeric value 1 to 7]   |
| B9.6 | --      | Recover ranking   | <b>Recover.</b> Reusing the materials already used so that they can be reintroduced as raw materials in the production process.                                   | [numeric value 1 to 7]   | <b>Recuperar.</b> Usar los materiales ya usados para poder reintroducirllos como materia prima en el proceso productivo                                                         | [numeric value 1 to 7]   |

Project BIOTRES-CM (S2018/EMT-4344),  
funded by the Community of Madrid and the European Regional Development Fund.

| Q.ID  | Q. Type  | Short definition            | Translation (English)                                                                                                                                                    |                          | Original formulation (Spanish)                                                                                                                                |                          |
|-------|----------|-----------------------------|--------------------------------------------------------------------------------------------------------------------------------------------------------------------------|--------------------------|---------------------------------------------------------------------------------------------------------------------------------------------------------------|--------------------------|
|       |          |                             | Question                                                                                                                                                                 | Values (separated by ; ) | Question                                                                                                                                                      | Values (separated by ; ) |
| B9.7  | --       | Recycle ranking             | <b>Recycle.</b> Sorting waste depending on whether they are organic, plastic, glass, paper or cardboard, metal or toxic and disposing them in the appropriate container. | [numeric value 1 to 7]   | <b>Reciclar.</b> Separar los desperdicios según sean orgánicos, plásticos, vidrios, papel o cartón, metales o tóxicos y deséchalos en el contenedor oportuno. | [numeric value 1 to 7]   |
| B10   | Ordering | --                          | Rank, from highest to lowest, those environmental and socioeconomic issues that most concern you.                                                                        | --                       | Clasifique, de mayor a menor, aquellas cuestiones ambientales y socioeconómicas que más le preocupen                                                          | --                       |
| B10.1 | --       | Air pollution               | Air pollution.                                                                                                                                                           | [numeric value 1 to 7]   | Contaminación del aire.                                                                                                                                       | [numeric value 1 to 7]   |
| B10.2 | --       | Food security               | Food security.                                                                                                                                                           | [numeric value 1 to 7]   | Seguridad alimentaria.                                                                                                                                        | [numeric value 1 to 7]   |
| B10.3 | --       | Biodiversity loss           | Biodiversity loss, deforestation and/or land degradation.                                                                                                                | [numeric value 1 to 7]   | Pérdida de la biodiversidad, deforestación y/o degradación del suelo.                                                                                         | [numeric value 1 to 7]   |
| B10.4 | --       | Waste disposal              | Waste disposal.                                                                                                                                                          | [numeric value 1 to 7]   | Eliminación de residuos.                                                                                                                                      | [numeric value 1 to 7]   |
| B10.5 | --       | Depletion natural resources | Depletion of natural resources.                                                                                                                                          | [numeric value 1 to 7]   | Agotamiento de recursos naturales.                                                                                                                            | [numeric value 1 to 7]   |

Project BIOTRES-CM (S2018/EMT-4344),  
funded by the Community of Madrid and the European Regional Development Fund.

| Q.ID  | Q. Type  | Short definition      | Translation (English)                                                                                                                             |                          | Original formulation (Spanish)                                                                                                                                   |                          |
|-------|----------|-----------------------|---------------------------------------------------------------------------------------------------------------------------------------------------|--------------------------|------------------------------------------------------------------------------------------------------------------------------------------------------------------|--------------------------|
|       |          |                       | Question                                                                                                                                          | Values (separated by ; ) | Question                                                                                                                                                         | Values (separated by ; ) |
| B10.6 | --       | Water pollution       | Water pollution and/or scarcity.                                                                                                                  | [numeric value 1 to 7]   | Contaminación y/o escasez del agua.                                                                                                                              | [numeric value 1 to 7]   |
| B10.7 | --       | Socio-economic impact | Socio-economic impact of climate change: loss of employment, worse economic situation....                                                         | [numeric value 1 to 7]   | Impacto socio-económico del cambio climático: pérdida de empleo, peor situación económica....                                                                    | [numeric value 1 to 7]   |
| B10.8 | --       | Human rights          | Lack of respect for human rights in product value chains.                                                                                         | [numeric value 1 to 7]   | Falta de respeto por los derechos humanos en las cadenas de valor de productos.                                                                                  | [numeric value 1 to 7]   |
| C11   | Ordering | --                    | Rank, from highest to lowest, the waste treatments that you consider should be prioritized by the administration.                                 | --                       | <i>Ordene, de mayor a menor, los tratamientos de residuos que considera que deben priorizarse por parte de la administración.</i>                                | --                       |
| C11.1 | --       | Incineration ranking  | <b>Incineration.</b> Waste is thermally destroyed by complete oxidation, transforming it into combustion gases and solid products (ash and slag). | [numeric value 1 to 4]   | <b>Incineración.</b> Se destruyen térmicamente mediante su oxidación completa, transformándolos en gases de combustión y productos sólidos (cenizas y escorias). | [numeric value 1 to 4]   |

Project BIOTRES-CM (S2018/EMT-4344),  
funded by the Community of Madrid and the European Regional Development Fund.

| Q.ID  | Q. Type | Short definition   | Translation (English)                                                                                                                          |                          | Original formulation (Spanish)                                                                                                                              |                          |
|-------|---------|--------------------|------------------------------------------------------------------------------------------------------------------------------------------------|--------------------------|-------------------------------------------------------------------------------------------------------------------------------------------------------------|--------------------------|
|       |         |                    | Question                                                                                                                                       | Values (separated by ; ) | Question                                                                                                                                                    | Values (separated by ; ) |
| C11.2 | --      | Landfill ranking   | <b>Controlled landfill.</b> The waste is deposited and/or buried in areas such as quarries or abandoned mines.                                 | [numeric value 1 to 4]   | <b>Vertido controlado.</b> Los residuos se depositan y/o entierran en espacios como canteras o minas abandonadas.                                           | [numeric value 1 to 4]   |
| C11.3 | --      | Pyrolysis ranking  | <b>Pyrolysis.</b> Waste is burned at high temperatures, generating more energy for its reuse and the production of bioproducts such as biogas. | [numeric value 1 to 4]   | <b>Pirólisis.</b> Los residuos se queman a altas temperaturas, generando más energía para su reutilización y la elaboración de bioproductos como el biogas. | [numeric value 1 to 4]   |
| C11.4 | --      | Composting ranking | <b>Composting.</b> Organic waste is decomposed to generate compost.                                                                            | [numeric value 1 to 4]   | <b>Compostaje.</b> Los residuos orgánicos se descomponen para generar compost.                                                                              | [numeric value 1 to 4]   |
| C12   | --      | --                 | Indicate your degree of agreement or disagreement with the following statements.                                                               | --                       | Indique su grado de acuerdo o desacuerdo con las siguientes afirmaciones.                                                                                   | --                       |

Project BIOTRES-CM (S2018/EMT-4344),  
funded by the Community of Madrid and the European Regional Development Fund.

| Q.ID  | Q. Type      | Short definition       | Translation (English)                                                                     |                                                                                                                           | Original formulation (Spanish)                                                                     |                                                                                                                                           |
|-------|--------------|------------------------|-------------------------------------------------------------------------------------------|---------------------------------------------------------------------------------------------------------------------------|----------------------------------------------------------------------------------------------------|-------------------------------------------------------------------------------------------------------------------------------------------|
|       |              |                        | Question                                                                                  | Values (separated by ; )                                                                                                  | Question                                                                                           | Values (separated by ; )                                                                                                                  |
| C12.1 | Likert scale | Essential sorting      | I believe correctly sorting waste at the source is essential to facilitate its treatment. | Completely disagree;<br>Slightly disagree;<br>Neither agree nor disagree;<br>Slightly agree;<br>Completely agree;<br>N/A; | Creo que es fundamental separar correctamente los residuos en origen para facilitar su tratamiento | Totalmente en desacuerdo;<br>Algo en desacuerdo;<br>Ni de acuerdo ni en desacuerdo;<br>Algo de acuerdo;<br>Totalmente de acuerdo;<br>N/A; |
| C12.2 | Likert scale | Sorting habit          | I always sort my waste: organic, packaging, glass, paper...                               | Completely disagree;<br>Slightly disagree;<br>Neither agree nor disagree;<br>Slightly agree;<br>Completely agree;<br>N/A; | Separo siempre los residuos: orgánico, envases, vidrio, papel...                                   | Totalmente en desacuerdo;<br>Algo en desacuerdo;<br>Ni de acuerdo ni en desacuerdo;<br>Algo de acuerdo;<br>Totalmente de acuerdo;<br>N/A; |
| C12.3 | Likert scale | Efficient Incineration | Incineration is the most efficient way to treat waste.                                    | Completely disagree;<br>Slightly disagree;<br>Neither agree nor disagree;<br>Slightly agree;<br>Completely agree;<br>N/A; | La incineración es la forma más eficaz de tratar los residuos                                      | Totalmente en desacuerdo;<br>Algo en desacuerdo;<br>Ni de acuerdo ni en desacuerdo;<br>Algo de acuerdo;<br>Totalmente de acuerdo;<br>N/A; |

Project BIOTRES-CM (S2018/EMT-4344),  
funded by the Community of Madrid and the European Regional Development Fund.

| Q.ID  | Q. Type      | Short definition     | Translation (English)                                         |                                                                                                                           | Original formulation (Spanish)                                               |                                                                                                                                                       |
|-------|--------------|----------------------|---------------------------------------------------------------|---------------------------------------------------------------------------------------------------------------------------|------------------------------------------------------------------------------|-------------------------------------------------------------------------------------------------------------------------------------------------------|
|       |              |                      | Question                                                      | Values (separated by ; )                                                                                                  | Question                                                                     | Values (separated by ; )                                                                                                                              |
| C12.4 | Likert scale | Efficient landfill   | Controlled landfill is the most efficient way to treat waste. | Completely disagree;<br>Slightly disagree;<br>Neither agree nor disagree;<br>Slightly agree;<br>Completely agree;<br>N/A; | <i>El vertido controlado es la forma más eficaz de tratar los residuos</i>   | <i>Totalmente en desacuerdo;<br/>Algo en desacuerdo;<br/>Ni de acuerdo ni en desacuerdo;<br/>Algo de acuerdo;<br/>Totalmente de acuerdo;<br/>N/A;</i> |
| C12.5 | Likert scale | Efficient Pyrolysis  | Pyrolysis is the most efficient way to treat waste            | Completely disagree;<br>Slightly disagree;<br>Neither agree nor disagree;<br>Slightly agree;<br>Completely agree;<br>N/A; | <i>La pirólisis es la forma más eficaz de tratar los residuos</i>            | <i>Totalmente en desacuerdo;<br/>Algo en desacuerdo;<br/>Ni de acuerdo ni en desacuerdo;<br/>Algo de acuerdo;<br/>Totalmente de acuerdo;<br/>N/A;</i> |
| C12.6 | Likert scale | Efficient Composting | Composting is the most efficient way to treat organic waste.  | Completely disagree;<br>Slightly disagree;<br>Neither agree nor disagree;<br>Slightly agree;<br>Completely agree;<br>N/A; | <i>El compostaje es la forma más eficaz de tratar los residuos orgánicos</i> | <i>Totalmente en desacuerdo;<br/>Algo en desacuerdo;<br/>Ni de acuerdo ni en desacuerdo;<br/>Algo de acuerdo;<br/>Totalmente de acuerdo;<br/>N/A;</i> |

Project BIOTRES-CM (S2018/EMT-4344),  
funded by the Community of Madrid and the European Regional Development Fund.



| Q.ID  | Q. Type    | Short definition                | Translation (English)                                                                         |                          | Original formulation (Spanish)                                                                                        |                          |
|-------|------------|---------------------------------|-----------------------------------------------------------------------------------------------|--------------------------|-----------------------------------------------------------------------------------------------------------------------|--------------------------|
|       |            |                                 | Question                                                                                      | Values (separated by ; ) | Question                                                                                                              | Values (separated by ; ) |
| D.13  | One choice | Biofuels vs fuels               | How likely would you use biofuels versus other fuels if you had the opportunity to choose?    | 1; 2; 3; 4; 5;           | ¿Con qué probabilidad usaría biocombustibles frente a otros combustibles si tuviese oportunidad de hacerlo?           | 1; 2; 3; 4; 5;           |
| D14   | Ordering   | --                              | Rank, from most to least important, the reasons why you WOULD use biofuels versus other fuels | --                       | Ordene de mayor a menor importancia las razones por las que SÍ utilizaría biocombustibles frente a otros combustibles | --                       |
| D14.1 | --         | Cheaper biofuels ranking        | Because they are cheaper                                                                      | [numeric value 1 to 6]   | Porque sean más económicos                                                                                            | [numeric value 1 to 6]   |
| D14.2 | --         | More efficient biofuels ranking | Because they are more efficient                                                               | [numeric value 1 to 6]   | Porque sean más eficientes                                                                                            | [numeric value 1 to 6]   |
| D14.3 | --         | Safer biofuels ranking          | Because they are safer                                                                        | [numeric value 1 to 6]   | Porque sean más seguros                                                                                               | [numeric value 1 to 6]   |
| D14.4 | --         | Environment biofuels ranking    | Because they are better for the environment                                                   | [numeric value 1 to 6]   | Porque sean mejores para el medio ambiente                                                                            | [numeric value 1 to 6]   |

Project BIOTRES-CM (S2018/EMT-4344),  
funded by the Community of Madrid and the European Regional Development Fund.

| Q.ID  | Q. Type  | Short definition            | Translation (English)                                                                                            |                          | Original formulation (Spanish)                                                                                                      |                          |
|-------|----------|-----------------------------|------------------------------------------------------------------------------------------------------------------|--------------------------|-------------------------------------------------------------------------------------------------------------------------------------|--------------------------|
|       |          |                             | Question                                                                                                         | Values (separated by ; ) | Question                                                                                                                            | Values (separated by ; ) |
| D14.5 | --       | Taxes biofuels ranking      | Because there are economic incentives for their installation and/or consumption (reduction of cost, taxes...)    | [numeric value 1 to 6]   | Porque haya ayudas económicas de incentivo para la instalación y/o el consumo de estos (reducción de coste, de impuestos...)        | [numeric value 1 to 6]   |
| D14.6 | --       | Employment biofuels ranking | c                                                                                                                | [numeric value 1 to 6]   | Porque generen empleo en mi entorno próximo                                                                                         | [numeric value 1 to 6]   |
| D15   | Ordering | --                          | Rank, from most to least important, the reasons why you would NOT be willing to use biofuels versus other fuels. | --                       | Ordene de mayor a menor importancia las razones por las que NO estaría dispuesto a usar biocombustibles frente a otros combustibles | --                       |
| D15.1 | --       | More expensive ranking      | Because they are more expensive                                                                                  | [numeric value 1 to 7]   | Porque sean más caros                                                                                                               | [numeric value 1 to 7]   |
| D15.2 | --       | Less efficient ranking      | Because they are less efficient                                                                                  | [numeric value 1 to 7]   | Porque sean menos eficientes                                                                                                        | [numeric value 1 to 7]   |
| D15.3 | --       | Less safe ranking           | Because they are less safe                                                                                       | [numeric value 1 to 7]   | Porque sean menos seguros                                                                                                           | [numeric value 1 to 7]   |

Project BIOTRES-CM (S2018/EMT-4344),  
funded by the Community of Madrid and the European Regional Development Fund.

| Q.ID  | Q. Type | Short definition   | Translation (English)                                                                                         |                          | Original formulation (Spanish)                                                                                                     |                          |
|-------|---------|--------------------|---------------------------------------------------------------------------------------------------------------|--------------------------|------------------------------------------------------------------------------------------------------------------------------------|--------------------------|
|       |         |                    | Question                                                                                                      | Values (separated by ; ) | Question                                                                                                                           | Values (separated by ; ) |
| D15.4 | --      | Nuisance ranking   | Because they may generate nuisances such as, for example, unpleasant odors                                    | [numeric value 1 to 7]   | <i>Porque puedan generar molestias como, por ejemplo, olores desagradables</i>                                                     | [numeric value 1 to 7]   |
| D15.5 | --      | Changes ranking    | Because they require changes to my installation                                                               | [numeric value 1 to 7]   | <i>Porque requieran hacer cambios en mi instalación</i>                                                                            | [numeric value 1 to 7]   |
| D15.6 | --      | Nor proven ranking | Because their use is not yet sufficiently proven                                                              | [numeric value 1 to 7]   | <i>Porque no esté suficientemente probado aún su uso</i>                                                                           | [numeric value 1 to 7]   |
| D15.7 | --      | No task ranking    | Because there is no economic incentive for installation and/or consumption (cost reduction, tax reduction...) | [numeric value 1 to 7]   | <i>Porque no haya ayudas económicas de incentivo para la instalación y/o para el consumo (reducción de coste, de impuestos...)</i> | [numeric value 1 to 7]   |

Project BIOTRES-CM (S2018/EMT-4344),  
funded by the Community of Madrid and the European Regional Development Fund.

| Q.ID  | Q. Type      | Short definition      | Translation (English)                                                                                                                                                                                                                                                                        |                                                                                                                           | Original formulation (Spanish)                                                                                                                                                                                                                                                                |                                                                                                                                           |
|-------|--------------|-----------------------|----------------------------------------------------------------------------------------------------------------------------------------------------------------------------------------------------------------------------------------------------------------------------------------------|---------------------------------------------------------------------------------------------------------------------------|-----------------------------------------------------------------------------------------------------------------------------------------------------------------------------------------------------------------------------------------------------------------------------------------------|-------------------------------------------------------------------------------------------------------------------------------------------|
|       |              |                       | Question                                                                                                                                                                                                                                                                                     | Values (separated by ; )                                                                                                  | Question                                                                                                                                                                                                                                                                                      | Values (separated by ; )                                                                                                                  |
| E16   | --           | --                    | Considering that biorefineries allow the generation of high value-added products such as biofuels, bioenergy (electricity and heat), products for the pharmaceutical industry and production of biopolymers, indicate the degree of agreement or disagreement with the following statements. | ---                                                                                                                       | Considerando que las biorefinerías permiten generar productos de alto valor añadido como biocombustibles, bioenergía (electricidad y calor), productos para la industria farmacéutica y producción de biopolímeros, indique el grado de acuerdo o desacuerdo con las siguientes afirmaciones. | ---                                                                                                                                       |
| E16.1 | Likert scale | Biorefinery near home | The inconvenience of having a biorefinery near my home is more than outweighed by the sustainability benefits they offer.                                                                                                                                                                    | Completely disagree;<br>Slightly disagree;<br>Neither agree nor disagree;<br>Slightly agree;<br>Completely agree;<br>N/A; | Las molestias que pudiera ocasionar la instalación de biorefinería cerca de mi hogar se compensan de sobra con los beneficios en materia de sostenibilidad que ofrecen                                                                                                                        | Totalmente en desacuerdo;<br>Algo en desacuerdo;<br>Ni de acuerdo ni en desacuerdo;<br>Algo de acuerdo;<br>Totalmente de acuerdo;<br>N/A; |

Project BIOTRES-CM (S2018/EMT-4344),  
funded by the Community of Madrid and the European Regional Development Fund.

| Q.ID  | Q. Type      | Short definition           | Translation (English)                                                                                                  |                                                                                                                           | Original formulation (Spanish)                                                                                                                |                                                                                                                                                       |
|-------|--------------|----------------------------|------------------------------------------------------------------------------------------------------------------------|---------------------------------------------------------------------------------------------------------------------------|-----------------------------------------------------------------------------------------------------------------------------------------------|-------------------------------------------------------------------------------------------------------------------------------------------------------|
|       |              |                            | Question                                                                                                               | Values (separated by ; )                                                                                                  | Question                                                                                                                                      | Values (separated by ; )                                                                                                                              |
| E16.2 | Likert scale | Biorefinery not close      | I would like to enjoy the benefits of biorefineries, but as long as the facility is not located close to my residence. | Completely disagree;<br>Slightly disagree;<br>Neither agree nor disagree;<br>Slightly agree;<br>Completely agree;<br>N/A; | <i>Me gustaría disfrutar de las ventajas de las biorefinerías, pero siempre que ello no suponga que la instalación esté cerca de mi hogar</i> | <i>Totalmente en desacuerdo;<br/>Algo en desacuerdo;<br/>Ni de acuerdo ni en desacuerdo;<br/>Algo de acuerdo;<br/>Totalmente de acuerdo;<br/>N/A;</i> |
| E16.3 | Likert scale | Biorefinery economic model | Biorefineries contribute to a more sustainable economic and consumption model.                                         | Completely disagree;<br>Slightly disagree;<br>Neither agree nor disagree;<br>Slightly agree;<br>Completely agree;<br>N/A; | <i>Las biorefinerías contribuyen a un modelo económico y de consumo más sostenible</i>                                                        | <i>Totalmente en desacuerdo;<br/>Algo en desacuerdo;<br/>Ni de acuerdo ni en desacuerdo;<br/>Algo de acuerdo;<br/>Totalmente de acuerdo;<br/>N/A;</i> |

Project BIOTRES-CM (S2018/EMT-4344),  
funded by the Community of Madrid and the European Regional Development Fund.

| Q.ID  | Q. Type      | Short definition                     | Translation (English)                                                                                                                                                                                                                                  |                                                                                                                           | Original formulation (Spanish)                                                                                                                                                                                                                                |                                                                                                                                                       |
|-------|--------------|--------------------------------------|--------------------------------------------------------------------------------------------------------------------------------------------------------------------------------------------------------------------------------------------------------|---------------------------------------------------------------------------------------------------------------------------|---------------------------------------------------------------------------------------------------------------------------------------------------------------------------------------------------------------------------------------------------------------|-------------------------------------------------------------------------------------------------------------------------------------------------------|
|       |              |                                      | Question                                                                                                                                                                                                                                               | Values (separated by ; )                                                                                                  | Question                                                                                                                                                                                                                                                      | Values (separated by ; )                                                                                                                              |
| E16.4 | Likert scale | Trust biorefinery products           | If I had the possibility, I would use products obtained in biorefineries, such as biofuels, bioenergy (electricity and heat), products for the pharmaceutical industry and the production of biopolymers, because I trust these products.              | Completely disagree;<br>Slightly disagree;<br>Neither agree nor disagree;<br>Slightly agree;<br>Completely agree;<br>N/A; | <i>Si tuviese posibilidad, usaría productos obtenidos en las biorefinerías, como biocombustibles, bioenergía (electricidad y calor), productos para la industria farmacéutica y producción de biopolímeros, porque me generan confianza.</i>                  | <i>Totalmente en desacuerdo;<br/>Algo en desacuerdo;<br/>Ni de acuerdo ni en desacuerdo;<br/>Algo de acuerdo;<br/>Totalmente de acuerdo;<br/>N/A;</i> |
| E16.5 | Likert scale | Biorefinery products expensive price | If I had the possibility, I would use products obtained from biorefineries, such as biofuels, bioenergy (electricity and heat), products for the pharmaceutical industry and biopolymer production, even if the price is even somewhat more expensive. | Completely disagree;<br>Slightly disagree;<br>Neither agree nor disagree;<br>Slightly agree;<br>Completely agree;<br>N/A; | <i>Si tuviese posibilidad, usaría productos obtenidos en las biorefinerías, como biocombustibles, bioenergía (electricidad y calor), productos para la industria farmacéutica y producción de biopolímeros, aunque el precio fuese incluso algo más caro.</i> | <i>Totalmente en desacuerdo;<br/>Algo en desacuerdo;<br/>Ni de acuerdo ni en desacuerdo;<br/>Algo de acuerdo;<br/>Totalmente de acuerdo;<br/>N/A;</i> |

Project BIOTRES-CM (S2018/EMT-4344),  
funded by the Community of Madrid and the European Regional Development Fund.

| Q.ID | Q. Type    | Short definition     | Translation (English)                                                                                                                                                                            |                          | Original formulation (Spanish)                                                                                                                                                                                                        |                          |
|------|------------|----------------------|--------------------------------------------------------------------------------------------------------------------------------------------------------------------------------------------------|--------------------------|---------------------------------------------------------------------------------------------------------------------------------------------------------------------------------------------------------------------------------------|--------------------------|
|      |            |                      | Question                                                                                                                                                                                         | Values (separated by ; ) | Question                                                                                                                                                                                                                              | Values (separated by ; ) |
| E17  | One choice | Biorefinery distance | How far away from your home would you be willing to have a biorefinery installed if it allowed you to have products such as biofuels or bioenergy (electricity and heat) available at your home? | 1 to 30 (km)             | ¿A qué distancia mínima de su domicilio estaría dispuesto a que se instalase una biorefinería si ello le permitiese disponer de productos como biocombustibles o bioenergía (electricidad y calor) en su hogar? Elija entre 1 y 20 km | 1 to 30 (km)             |

Project BIOTRES-CM (S2018/EMT-4344),  
funded by the Community of Madrid and the European Regional Development Fund.

|                                                                     |                                                            |                                                                                             |                                                                                                                                                             |                                                                                                                                                                                                                                                                                                                                                                                                                                                                                                                                                                                                                                                                                                                                                                                       |                                                                                                                                                                                       |                                                                                                                                                                                                                                                                                                                                                                                                                                                                                                                                                                                                                                                                                                                                                                                                                                                                                                                                              |
|---------------------------------------------------------------------|------------------------------------------------------------|---------------------------------------------------------------------------------------------|-------------------------------------------------------------------------------------------------------------------------------------------------------------|---------------------------------------------------------------------------------------------------------------------------------------------------------------------------------------------------------------------------------------------------------------------------------------------------------------------------------------------------------------------------------------------------------------------------------------------------------------------------------------------------------------------------------------------------------------------------------------------------------------------------------------------------------------------------------------------------------------------------------------------------------------------------------------|---------------------------------------------------------------------------------------------------------------------------------------------------------------------------------------|----------------------------------------------------------------------------------------------------------------------------------------------------------------------------------------------------------------------------------------------------------------------------------------------------------------------------------------------------------------------------------------------------------------------------------------------------------------------------------------------------------------------------------------------------------------------------------------------------------------------------------------------------------------------------------------------------------------------------------------------------------------------------------------------------------------------------------------------------------------------------------------------------------------------------------------------|
| E18<br>[M1]<br>[M2]<br>[M3]<br>[M4]<br>[M5]<br>[M6]<br>[M7]<br>[M8] | Multiple<br>choice +<br>Open-ended<br>"other<br>(specify)" | Requirements<br>in town [M1],<br>[M2],<br>[M3],<br>[M4],<br>[M5],<br>[M6],<br>[M7],<br>[M8] | In case a facility is<br>decided to be built in<br>your town, please<br>indicate which of the<br>following requirements<br>would you consider<br>essential. | <p>That odors produced by the treatment plant were reduced or eliminated by means of odor capture systems, roofing, etc., and that the plant had insect pest treatment systems;</p> <p>That it generated local employment;</p> <p>That it promoted collaboration with industry and businesses in the region;</p> <p>That locations that reduce the visual impact of the facility were chosen;</p> <p>That the generation of this bioenergy were used for local demand in the area (for example, in electricity or heat);</p> <p>That additional locations were sought or additional road infrastructure were built to reduce the impact of truck traffic;</p> <p>That all measures to make the plant safe were taken;</p> <p>Under no circumstances I would be willing to have it</p> | <p><i>En el caso de que se decidiese que la instalación de la planta se realizase en su población, indique cuáles, de los siguientes requisitos consideraría imprescindibles.</i></p> | <p><i>Que los olores que pueda producir la planta de tratamiento se reduzcan o eliminen mediante sistemas de capturas de olores, techado, etc., y que la planta cuente con sistemas de tratamiento de plagas de insectos;</i></p> <p><i>Que genere empleo local;</i></p> <p><i>Que impulse la colaboración con la industria y negocios de la región;</i></p> <p><i>Que se busquen localizaciones que reduzcan el impacto visual de la instalación;</i></p> <p><i>Que la generación de esa bioenergía se destine a la demanda local de la zona (por ejemplo, en electricidad o calor);</i></p> <p><i>Que se busquen localizaciones o se realicen infraestructuras viarias adicionales que reduzcan el impacto de la circulación de camiones;</i></p> <p><i>Que se tomen todas las medidas para que la planta sea segura</i></p> <p><i>En ningún caso estaría dispuesto a que se instalase en mi población ni en ninguna otra cercana;</i></p> |
|---------------------------------------------------------------------|------------------------------------------------------------|---------------------------------------------------------------------------------------------|-------------------------------------------------------------------------------------------------------------------------------------------------------------|---------------------------------------------------------------------------------------------------------------------------------------------------------------------------------------------------------------------------------------------------------------------------------------------------------------------------------------------------------------------------------------------------------------------------------------------------------------------------------------------------------------------------------------------------------------------------------------------------------------------------------------------------------------------------------------------------------------------------------------------------------------------------------------|---------------------------------------------------------------------------------------------------------------------------------------------------------------------------------------|----------------------------------------------------------------------------------------------------------------------------------------------------------------------------------------------------------------------------------------------------------------------------------------------------------------------------------------------------------------------------------------------------------------------------------------------------------------------------------------------------------------------------------------------------------------------------------------------------------------------------------------------------------------------------------------------------------------------------------------------------------------------------------------------------------------------------------------------------------------------------------------------------------------------------------------------|

Project BIOTRES-CM (S2018/EMT-4344),  
funded by the Community of Madrid and the European Regional Development Fund.



| Q.ID  | Q. Type  | Short definition              | Translation (English)                                                                                                         |                                                                       | Original formulation (Spanish)                                                                                                         |                          |
|-------|----------|-------------------------------|-------------------------------------------------------------------------------------------------------------------------------|-----------------------------------------------------------------------|----------------------------------------------------------------------------------------------------------------------------------------|--------------------------|
|       |          |                               | Question                                                                                                                      | Values (separated by ; )                                              | Question                                                                                                                               | Values (separated by ; ) |
|       |          |                               |                                                                                                                               | installed in my town or in any other nearby town;<br>Other (specify); |                                                                                                                                        | Otro (especifique);      |
| E19   | Ordering | ---                           | Rank, from most to least, the aspects that most concern you about the installation of a waste treatment plant near your home. | ---                                                                   | Orden de mayor a menor los aspectos que más le preocupan de la instalación de una planta de tratamiento de residuos cerca de su hogar. | ---                      |
| E19.1 | ---      | Odors concern ranking         | Odors, insect infestation, dirt, etc.                                                                                         | [numeric value 1 to 5]                                                | Que haya olores o plagas de insectos, suciedad, etc.                                                                                   | [numeric value 1 to 5]   |
| E19.2 | ---      | Visual impact concern ranking | Visual impact                                                                                                                 | [numeric value 1 to 5]                                                | Que tengan impacto visual                                                                                                              | [numeric value 1 to 5]   |
| E19.3 | ---      | Truck traffic concern ranking | Heavy truck traffic                                                                                                           | [numeric value 1 to 5]                                                | Que haya mucha circulación de camiones                                                                                                 | [numeric value 1 to 5]   |
| E19.4 | ---      | Unsafety concern ranking      | Unsafety                                                                                                                      | [numeric value 1 to 5]                                                | Que pueda ser inseguro                                                                                                                 | [numeric value 1 to 5]   |
| E19.5 | ---      | Nuisances concern ranking     | Plant construction nuisances                                                                                                  | [numeric value 1 to 5]                                                | Que la construcción de la planta genere molestias                                                                                      | [numeric value 1 to 5]   |

Project BIOTRES-CM (S2018/EMT-4344),  
funded by the Community of Madrid and the European Regional Development Fund.

| Q.ID | Q. Type    | Short definition | Translation (English)                                                                                                                                            |                          | Original formulation (Spanish)                                                                                                                                       |                          |
|------|------------|------------------|------------------------------------------------------------------------------------------------------------------------------------------------------------------|--------------------------|----------------------------------------------------------------------------------------------------------------------------------------------------------------------|--------------------------|
|      |            |                  | Question                                                                                                                                                         | Values (separated by ; ) | Question                                                                                                                                                             | Values (separated by ; ) |
| F20  | Open-ended | Comments         | If you wish, you may leave a final comment on any of the issues raised.                                                                                          | [text]                   | <i>Si lo desea, puede dejar un comentario final sobre cualquiera de las cuestiones tratadas.</i>                                                                     | [text]                   |
| F21  | Open-ended | Email interested | If you are interested in receiving the results of the survey, you can provide us with an e-mail address so that we can send them to you once they are available. | [text]                   | <i>Si está interesado en recibir los resultados de la encuesta, puede indicarnos un correo electrónico para que le enviemos estos una vez que estén disponibles.</i> | [text]                   |

Project BIOTRES-CM (S2018/EMT-4344),  
funded by the Community of Madrid and the European Regional Development Fund.
